# Supplementary material for: Identification and characterization of Streptomyces flavogriseus NJ-4 as a novel producer of actinomycin D and holomycin
Source: PeerJ. 2017 Jul 19;5:e3601. doi: 10.7717/peerj.3601 (PMC5520960; doi:10.7717/peerj.3601)
Supplement: Data S1 — Figure 4 Time course production of actinomycin D of strain NJ-4 cultured in CS (triangle), GSS (square) and GS (circle) media. Figure 5Time course production of holomycin of strain NJ-4 cultured in CS (triangle), GSS (square) and GS (circle) media. Figure 6Proliferative inhibition of holomycin on 293T normal human cells, A549 lung cancer cells, BGC-823 gastric cancer cells, HepG2 hepatoma cells. Figure S9 Time course of redox potential of fermentation broth of strain NJ-4 cultured in GS (square), GSS (circle) and CS (triangle) media. Figure S10 The ratio changes of NAD/NADH of strain NJ-4 cultured in GS (square), GSS (circle) and CS (triangle) media. [file peerj-05-3601-s002.xls]

## Sheet: Sheet1
				Fig 4 Time course production of actinomycin D of strain NJ-4 cultured in CS (triangle), GSS (square) and GS (circle) media
	Fermentation time/days				1	2	3	4	5	6	7
	Yield of holomycin/ mg/l			GS media	16.3±1.2	25.6±1.8	65.1±3.9	120.9±7.8	146.7±6.5	178.2±9.8	191.4±14.5
				GSS media	40.2±1.7	65.2±2.6	130.9±4.9	280.4±9.6	392.6±16.4	525.8±28.1	561.9±25.4
				CS media	80.5±3.5	115.3±4.6	208.5±8.5	468.3±15.6	628.4±18.4	885.3±24.4	962.6±28.4
				Fig 5 Time course production of holomycin of strain NJ-4 cultured in CS (triangle), GSS (square) and GS (circle) media
	Fermentation time/days				1	2	3	4	5	6	7
	Yield of holomycin/ mg/l			GS media	0.05±0.002	2.15±0.08	3.95±0.23	5.57±0.32	9.16±0.45	8.26±0.32	8.01±0.38
				GSS media	0	0	0	0	0	0	0
				CS media	0	0	0	0	0	0	0
		Fig 6 Proliferative inhibition of holomycin on 293T normal human cells, A549 lung cancer cells, BGC-823 gastric cancer cells, HepG2 hepatoma cells
		Concentration of holomycin (mM)				5	10	20	200
		Inhibition rate (%)			293T	1.3±0.065	13.9±0.78	54.9±2.1	89.5±3.9
					A549	0.9±0.06	15.7±0.65	77.9±3.2	92.5±2.6
					BGC-823	1.7±0.078	39.4±1.6	67.2±2.4	93.7±3.8
					HepG2	9.1±0.086	30.2±1.3	78.4±3.2	95.7±4.3
			Fig S9 Time course of redox potential of fermentation broth of strain NJ-4 cultured in GS(square) , GSS (circle) and CS (triangle) media
				Fermentation time (day)	1	2	3	4	5	6	7
			Redox potential (mV)	GS media	580.6±14.3	558.5±16.4	508.8±15.8	476.1±11.2	465.4±11.2	453.6±14.6	442.7±9.4
				GSS media	452.1±15.2	384.8±10.5	302.4±10.7	267.9±10.3	230.2±11.6	214.6±11.8	201.8±8.6
				CS media	465.7±17.1	416.4±11.6	369.7±10.7	308.4±9.7	264.9±11.4	237.1±8.9	221.5±7.8
				Fig S10 The ratio changes of NAD/NADH of strain NJ-4 cultured in GS(square) , GSS (circle) and CS (triangle) media
				Fermentation time (day)	1	2	3	4	5	6	7
			The ratio of NAD/NADH	GS media	20.6±0.72	21.7±0.64	25.3±1.12	36.7±0.96	54.41±1.76	64.6±1.91	68.2±2.13
				GSS media	8.9±0.29	10.8±0.21	12.4±0.43	13.8±0.39	15.2±0.48	16.7±0.54	18.6±0.41
				CS media	3.1±0.11	3.3±0.13	3.6±0.16	4.8±0.19	6.4±0.21	8.5±0.29	10.8±0.38
